## CORRECTION

# Correction: Defined conditions for propagation and manipulation of mouse embryonic stem cells (doi:10.1242/dev.173146)

**Carla Mulas, Tüzer Kalkan, Ferdinand von Meyenn, Harry G. Leitch, Jennifer Nichols and Austin Smith**

There was an error in the supplementary data of *Development* (2019) **146**, dev173146 (doi:10.1242/dev.173146).

Part of Table S1 was omitted from the supplementary data. Table S1 has now been updated.

The updated supplementary data are now available online at <http://dev.biologists.org/content/146/6/dev173146.supplemental>.

The authors apologise to readers for this mistake.
